# Supplementary material
Source: Springer Nature journal article supplement (https://www.springermedizin.de/resource/supplementary/12911_2009_302_MOESM6_ESM.pdf/9525454)

### Distribution of the number of events

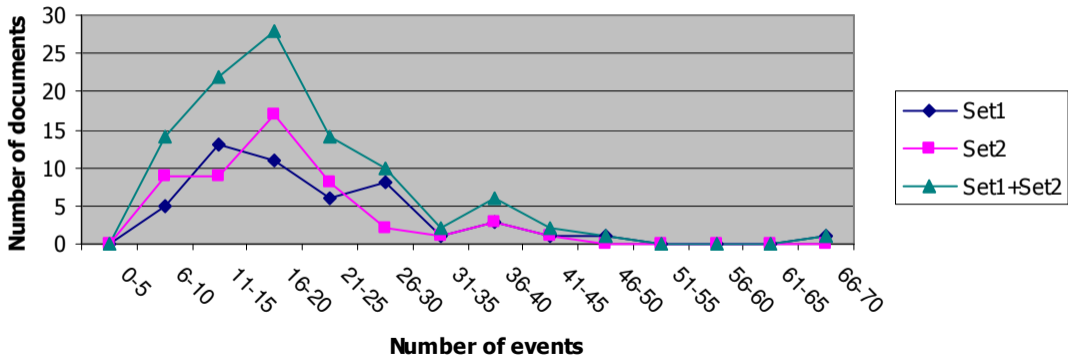

Supplement: MOESM6 [file 9525454]
